# Supplementary material for: Reduced monoclinic BiVO4 for improved photoelectrochemical oxidation of water under visible light
Source: Royal Society of Chemistry journal article supplement (doi:10.1039/c3dt53575d), 2014-01-01
Supplement: c3dt53575d1.pdf [file c3dt53575d1.pdf]

## Supporting information

### Reduced Monoclinic BiVO<sub>4</sub> for Improved Photoelectrochemical Oxidation of Water under Visible Light

Dong-Dong Qin,<sup>\*a</sup> Ting Wang,<sup>a</sup> Yu-Min Song<sup>a</sup> and Chun-Lan Tao<sup>b</sup>

<sup>a</sup> College of Chemistry and Chemical Engineering, Northwest Normal University, Lanzhou, Gansu 730070, People's Republic of China

<sup>b</sup> School of Physical Science and Technology, Lanzhou University, Lanzhou, Gansu, 730000, Republic of China

\*To whom the corresponding should be addressed at: [qindd05@gmail.com](mailto:qindd05@gmail.com)

## 1. Experimental

The morphology and size of nanocrystals in the as-prepared films were characterized by using a field-emission scanning electron microscope (Zeiss ULTRA Plus) operated at an accelerating voltage of 5 kV. X-ray diffraction patterns (XRD) were recorded on a PANalytical X'Pert PRO instrument using Cu K $\alpha$  radiation (40 kV,  $\lambda = 1.5406 \text{ \AA}$ ) between  $20^\circ$  to  $70^\circ$  at a scanning rate of  $0.067^\circ/\text{s}$ . UV-visible diffusion reflectance spectra were measured on a UV-2550 (Shimadzu) spectrometer by using BaSO $_4$  as the reference. The elemental composition was determined by X-ray photoelectron spectroscopy (XPS, Kratos Axis Ultra DLD). Photoelectrochemical measurements were made using a three-electrode configuration with the BiVO $_4$  film as the working photoelectrode, saturated calomel electrode (SCE) as the reference electrode, and platinum foil as the counter electrode in 0.1 M Na $_2$ SO $_4$ . Sunlight was simulated with a 300 W xenon lamp and an AM1.5G filter (HSX-F300, Beijing NBeT Technology Co., Ltd), coupled with a 420 nm UV filter. The light intensity was set using a calibrated crystalline silicon solar cell. Photocurrent response and electrochemical impedance spectroscopy (EIS) were recorded using a CHI-660D potentiostat, with the data fit to an equivalent circuit model using ZView software. The superimposed alternating current (AC) signal was maintained at 5 mV, while the frequency was scanned between 100 kHz and 0.05 Hz at potentials between 0 and 0.8 V versus SCE in the dark and under illumination by visible light in an electrolyte of 0.1 M Na $_2$ SO $_4$ , with Pt as the counter electrode. The capacitance was extracted from the EIS spectra by use of an equivalent circuit Rs(CPE-Rp), where Rs is the ohmic contribution, CPE is the constant phase element that takes into account non-idealities in the capacitance of the Helmholtz layer, and Rp is the charge-transfer resistance. The curve of photocurrent response as a function of wavelength were measured using light from a 300 W xenon lamp that was focused by a parabolic reflector and passed through a monochromator, at 0.8 V bias versus SCE. Samples were measured using a BiVO $_4$  film as the working photoelectrode and platinum foil as the counter electrode in 0.1 M Na $_2$ SO $_4$ .

## 2. Electrochemical impedance spectra

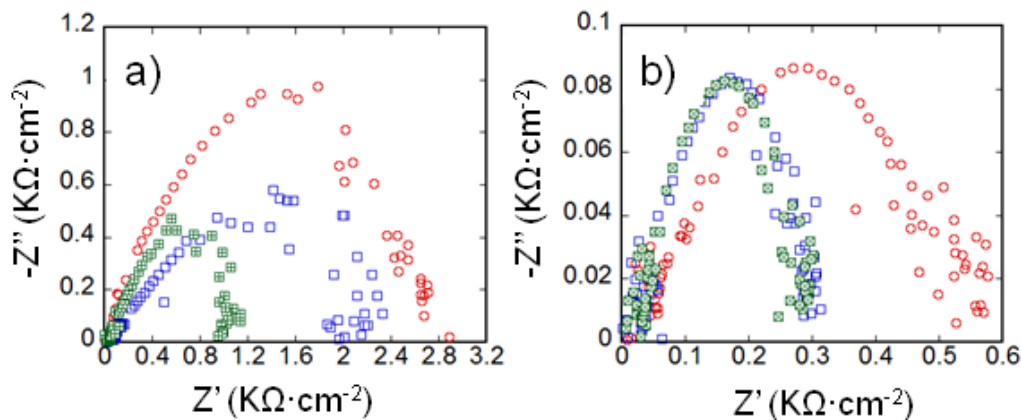

Fig. S1 Electrochemical impedance spectra of BiVO $_4$  film in 0.1 M Na $_2$ SO $_4$ , illuminated by visible light ( $\lambda > 420 \text{ nm}$ ). Red is the pristine BiVO $_4$ , blue is the BiVO $_4$  film after electrochemical reduction at -1.0 V,

green is the  $\text{BiVO}_4$  film after both electrochemical and  $\text{NaBH}_4$  reduction. a) is illuminated from  $\text{BiVO}_4$  side (front side), b) is illuminated from FTO side (back side).

### 3. XPS spectra

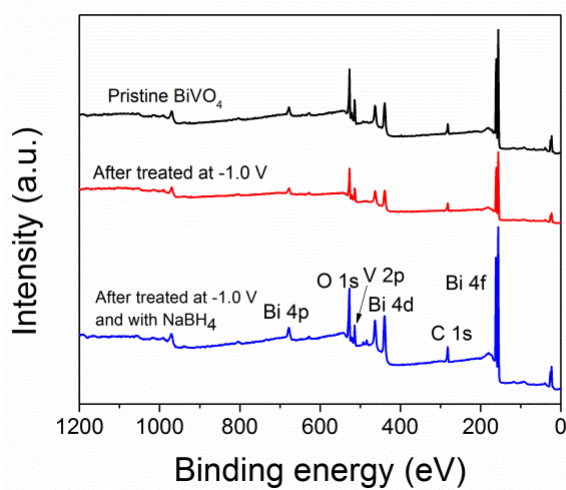

Fig. S2 XPS spectra of  $\text{BiVO}_4$  film

### 4. Stability assay

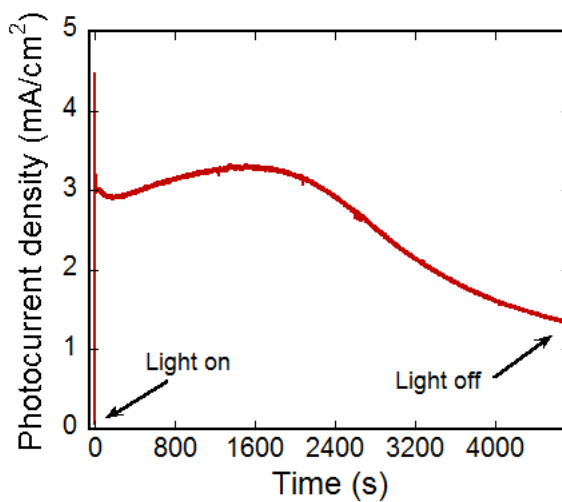

Fig. S3 *i-t* curve of the  $\text{BiVO}_4$  after treated electrochemically at -1.0 V and followed with  $\text{NaBH}_4$ . Experiment was conducted at 1.0 V vs Ag/AgCl in 0.1 M  $\text{Na}_2\text{SO}_4$  solution for 5000s.
